# Supplementary material for: Modulating the atomic and electronic structures through alloying and heterostructure of single-layer MoS2
Source: Royal Society of Chemistry journal article supplement (doi:10.1039/c3ta13659k), 2013-11-22
Supplement: c3ta13659k.pdf [file c3ta13659k.pdf]

## Modulating the atomic and electronic structure through alloying and heterostructure of single-layer MoS<sub>2</sub>

Xiao-Lin Wei<sup>a,b</sup>, Hui Zhang<sup>b,c</sup>, Gen-Cai Guo<sup>a</sup>, Xi-Bo Li<sup>b</sup>, Woon-Ming Lau<sup>b,d</sup>, Li-Min Liu<sup>b\*</sup>

<sup>a</sup> Laboratory for Quantum Engineering and Micro-Nano Energy Technology, Department of Physics, Xiangtan University, Xiangtan, Hunan 411105, China

<sup>b</sup> Beijing Computational Science Research Center, Beijing 100084, China.

<sup>c</sup> Normal college, Shenyang University, Shenyang 110044, China

<sup>d</sup> Chengdu Green Energy and Green Manufacturing Technology R&D Center, Chengdu, Sichuan, 610207, China

\* Email: [limin.liu@csrc.ac.cn](mailto:limin.liu@csrc.ac.cn)

Table S1. The *neighboring T-T bonds number*,  $N_{TT}$ , correlation functions ( $\bar{\Pi}_{2,1}$ ,  $\bar{\Pi}_{2,2}$  and  $\bar{\Pi}_{2,3}$ ) of the SQSs structures, compared with the ideal random solutions.

|                   | Mo <sub>0.75</sub> T <sub>0.25</sub> S <sub>2</sub> |        | Mo <sub>0.5</sub> T <sub>0.5</sub> S <sub>2</sub> |         |
|-------------------|-----------------------------------------------------|--------|---------------------------------------------------|---------|
|                   | Random                                              | SQS-16 | Random                                            | SQS-16  |
| $N_{TT}$          | 3                                                   | 3      | 12                                                | 12      |
| $\bar{\Pi}_{2,1}$ | 0.25                                                | 0.25   | 0                                                 | 0       |
| $\bar{\Pi}_{2,2}$ | 0.25                                                | 0.25   | 0                                                 | 0       |
| $\bar{\Pi}_{2,3}$ | 0.25                                                | 0.25   | 0                                                 | -0.3333 |

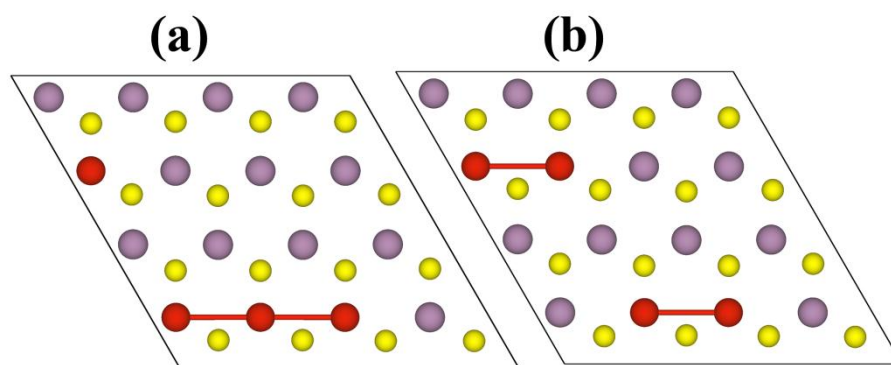

**Fig. S1** Two additional configurations of  $\text{Mo}_{0.75}\text{Cr}_{0.25}\text{S}_2$  considered for checking reliability of SQS: (a) three T atoms connected in a straight line and (b) two parallel pairs of neighboring T atoms.

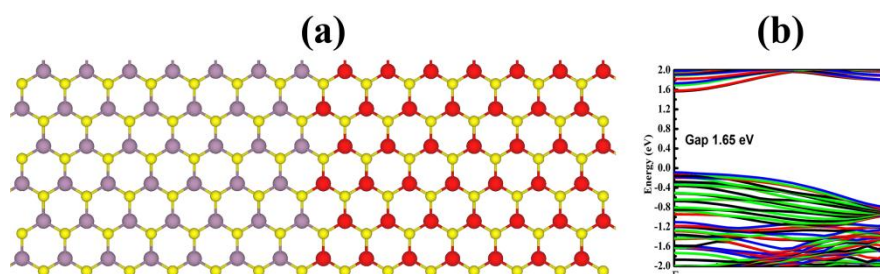

**Fig. S2** The atomic structure (a) and band structure (b) of armchair  $\text{MoS}_2\text{-WS}_2$  heterostructure with the strip width of 22 Å, as mentioned in the context.

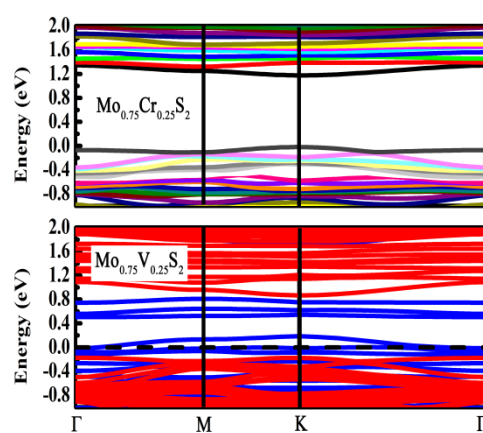

**Fig. S3** The calculated band structures of  $\text{Mo}_{0.75}\text{V}_{0.25}\text{S}_2$  and  $\text{Mo}_{0.75}\text{Cr}_{0.25}\text{S}_2$  with DFT+U ( $U = 5.95\text{eV}$ ,  $J = 0.95\text{eV}$ ). The calculated band gap of  $\text{Mo}_{0.75}\text{Cr}_{0.25}\text{S}_2$  is about 1.2 eV.

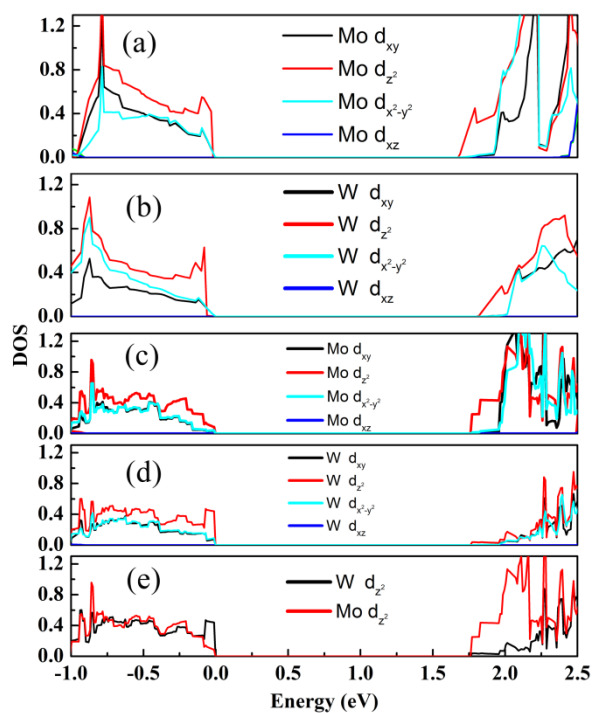

**Fig. S4** Projected density of states (PDOS) of  $d$  orbitals for pure  $\text{MoS}_2$  (a), pure  $\text{WS}_2$  (b) and heterostructure of armchair  $\text{MoS}_2$ - $\text{WS}_2$  (The width of the strip is  $12.7 \text{ \AA}$ , which corresponds to AHS) (c) and (d) show the PDOS of Mo and W atoms of heterostructure. (e) shows the  $d_{z^2}$  of both Mo and W atoms in heterostructure.
